# Supplementary material for: Implementation of a Rural Community Diagnostic Testing Strategy for SARS-CoV-2 in Upstate South Carolina
Source: PubMed Central journal article supplement (PMC9016164; doi:10.3389/fpubh.2022.858421), 2022-04-05
Supplement: Data_Sheet_1.pdf [file Data_Sheet_1.pdf]

## Supplementary Material

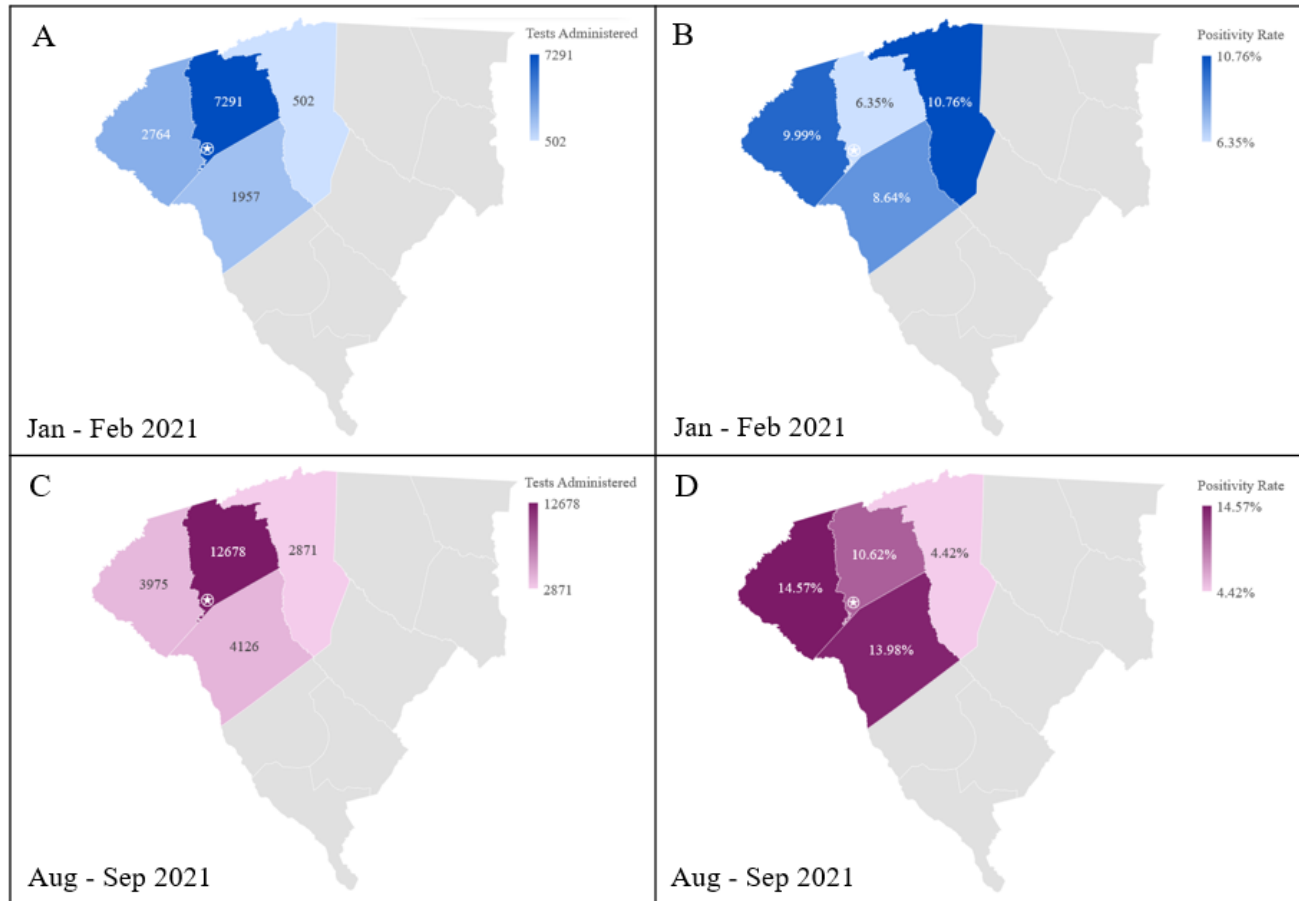

**Supplementary Figure 1. Relationship between positivity rate/testing quantity and geographic distribution across Upstate South Carolina during two SARS-CoV-2 outbreaks.** Only Pickens, Oconee, Anderson, and Greenville Counties met a minimum number of tests (500) appropriate for analysis. The star indicates Clemson University. The top two panels display the number of tests administered by the REDDI Laboratory (**A**) and the percentage of positive cases (**B**) throughout Jan-Feb 2021. The bottom two panels display the number of tests administered by the REDDI Lab (**C**) and the percentage of positive cases (**D**) throughout Aug-Sept 2021. The changing strain composition during these outbreaks may have contributed to variations in disease prevalence.

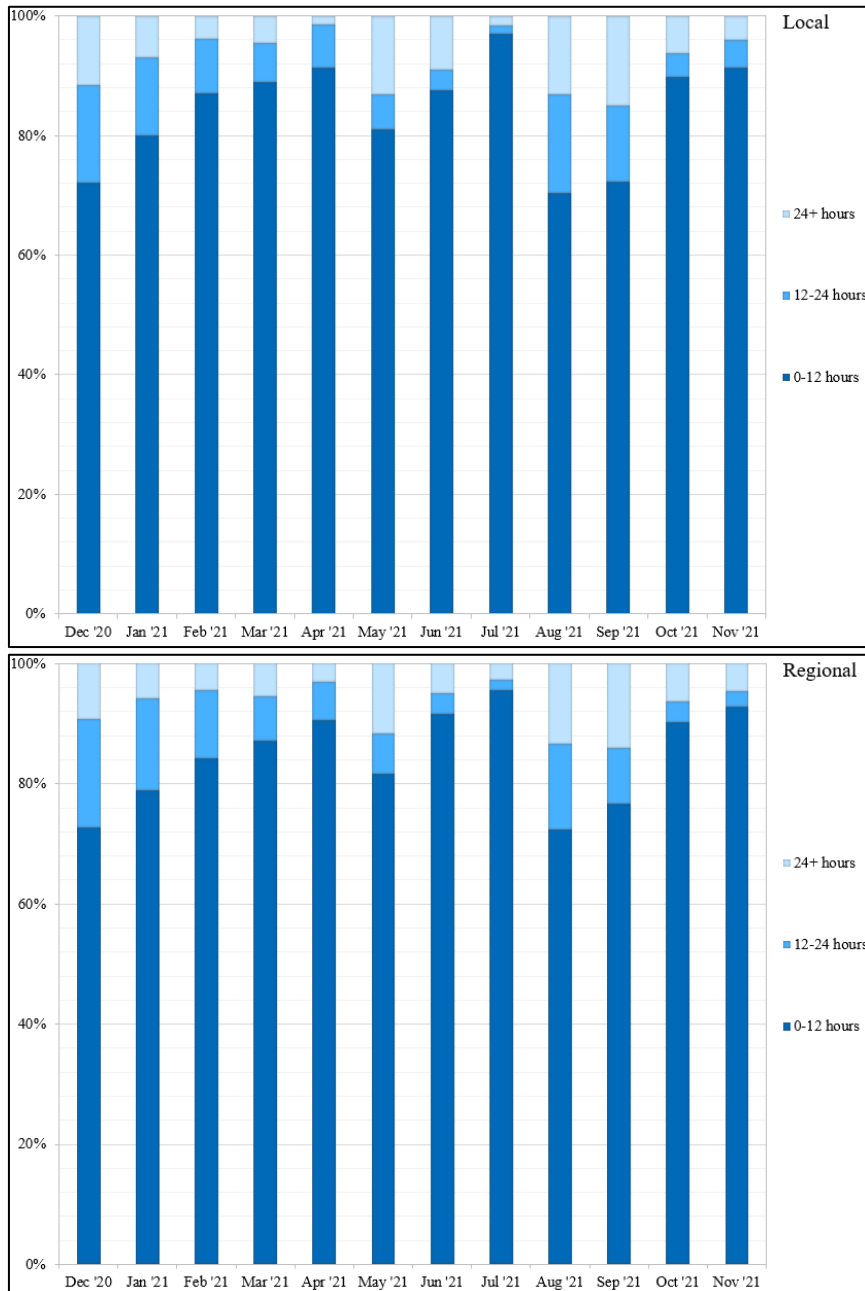

**Supplementary Figure 2. Turn-around time for the Local and Regional Community groups.** Turn around time was similar between the two groups.
